# Supplementary material for: Molecular Detection of Tetracycline-Resistant Genes in Multi-Drug-Resistant Escherichia coli Isolated from Broiler Meat in Bangladesh
Source: MDPI journal article supplement (doi:10.3390/antibiotics12020418), 2023-02-20
Supplement: s1 [file s1]

Supplementary Table S3:

Zone of Inhibition of the antimicrobial agents to classify as susceptible and resistance to *E. coli* (1)

| Antimicrobial Agents                        | Zone of Inhibition (mm) |              |            |
|---------------------------------------------|-------------------------|--------------|------------|
|                                             | Susceptible             | Intermediate | Resistance |
| Cephalexin (CL, 30 µg)                      | ≥15                     | -            | ≤14        |
| Ampicillin (AMP, 10 µg)                     | ≥17                     | 14 -16       | ≤13        |
| Tetracycline (TE, 30 µg)                    | ≥15                     | -            | ≤11        |
| Doxycycline (DO, 30 µg)                     | ≥14                     | -            | ≤10        |
| Gentamicin (CN, 10 µg)                      | ≥17                     | -            | ≤14        |
| Ciprofloxacin (CIP, 5 µg)                   | ≥31                     | 21 - 30      | ≤20        |
| Sulphamethoxazole trimethoprim (SXT, 25 µg) | ≥16                     | 11 -15       | ≤10        |

Reference:

1. CLSI. Performance Standards for Antimicrobial Susceptibility Testing 2020 [Available from: <https://www.nih.org.pk/wp-content/uploads/2021/02/CLSI-2020.pdf>.
